# Supplementary material
Source: publisher figshare collection journal article supplement (https://gsajournals.figshare.com/ndownloader/files/21237546)
Supplement: Supplementary file 1 [file 21237546]

## Sheet: mab-5_SMFISH (Figure 2)
mab-5 probe
20°C						25°C
V5a	V5p	V6aa	V6ap	V6pa	V6pp	V5a	V5p	V6aa	V6ap	V6pa	V6pp
20	6	19	3	11	2	7	9	16	14	0	5
7	1	46	8	10	20	4	4	21	7	32	17
4	24	25	25	25	9	4	13	4	4	13	9
0	1	18	12	30	7	5	2	34	5	17	6
14	11	19	7	2	5	4	2	9	4	8	29
0	6	23	5	37	19	0	20	17	10	15	1
2	8	26	28	12	13	0	9	25	14	4	16
6	3	42	6	14	24	0	2	25	10	10	6
0	8	17	4	33	1	3	2	23	0	11	9
6	18	19	21	15	7	12	30	22	8	3	29
1	14	44	4	17	7	6	13	29	17	30	7
6	6	40	18	11	5	5	3	18	10	18	18
2	5	20	27	22	0	0	36	9	1	11	2
4	3	31	8	10	0	9	22	14	3	0	15
7	8	54	14	50	10	0	29	14	18	6	8
1	13	13	28	16	17	1	10	29	16	3	28
5	5	9	19	13	5	8	10	16	6	8	34
6	14	45	24	16	0	1	1	3	0	0	40
9	11	21	10	4	12	2	4	32	17	11	17
3	2	20	5	19	3	2	16	5	5	2	15
20	28	57	27	40	0	12	25	15	2	0	28
11	2	39	25	10	28	10	23	25	7	18	20
12	31	18	27	3	5	0	6	24	8	9	23
3	2	41	19	19	24	8	0	22	10	14	3
21	0	45	21	29	13	3	4	28	28	23	1
14	4	25	26	30	14	17	7	25	11	4	8
2	17	11	3	11	42	1	12	20	12	36	15
9	7	26	15	7	16	4	15	39	21	29	3
0	9	16	17	3							11

## Sheet: bar-1_SMFISH (Figure 3)
bar-1 probe
20°C				25°C
V6aa	V6ap	V6pa	V6pp	V6aa	V6ap	V6pa	V6pp
11	3	13	1	24	6	4	18
6	9	18	7	12	13	18	14
11	5	9	5	6	17	4	8
4	5	2	12	15	16	4	6
10	1	12	4	19	3	4	1
3	13	2	5	17	10	9	16
12	18	9	4	10	6	0	2
14	2	9	0	5	9	3	9
14	9	10	12	2	6	14	7
2	11	3	9	12	9	6	6
8	16	8	8	2	8	1	1
1	4	11	5	5	10	9	3
10	0	6	4	20	3	20	2
1	3	9	2	0	11	1	23
7	5	10	9	0	6	3	2
5	0	5	1	2	2	5	1
8	8	9	7	12	3	7	1
3	8	1	11	0	6	1	7
26	1	29	4	3	0	2	1
7	3	12	4	7	1	7	1
7	7	5	23	22	16	13	4
9	10	9	6	15	33	12	12
2	2	4	3	9	26	14	12
6	16	9	6	17	26	12	14
9	3	12	2	35	36	8	12
4	3	13	9	5	35	4	11
7	7	16	6	7	29	16	3
23	7	22	14	4	7	9	5
	10		9	12	5	6	7
	19		12	1	9	8	2
				4	4	4	4
				12	1	6	5
				5	1	3	3
				6	9	24	7
				2	7	1	14
				9	2	4	1
				3	23	3	4
				5	1	17	7
				0	8	22	8
				6	0	5	6
				16	4	11	5
				15	13	3	3
				6	11	1	2
				9	8	11	6
				14	9	1	15
				1	10	11	0
				2	1	2	9
				13	0	1	3
				8	5	0	3
				2	10	7	0
				0	0	1	5
				2	0		1
				8	2
					7

## Sheet: egl-18_SMFISH (Figure 4)
egl-18 probe
20°C						25°C
V5a	V5p	V6aa	V6ap	V6pa	V6pp	V5a	V5p	V6aa	V6ap	V6pa	V6pp
10	54	21	54	12	4	8	56	5	7	23	26
4	41	6	39	11	27	16	14	1	3	16	11
7	43	4	80	8	74	44	26	43	32	6	41
1	59	5	69	9	59	8	47	8	39	0	1
4	35	3	34	16	25	7	37	57	54	2	23
5	47	13	54	9	47	1	12	12	19	0	21
4	33	0	21	3	6	4	65	2	49	2	17
14	62	34	49	11	58	9	31	2	40	0	6
0	22	5	4	6	58	7	28	37	32	4	47
1	44	3	38	5	45	0	14	4	15	2	7
4	33	9	13	2	26	11	39	2	20	1	30
2	33	4	47	1	54	0	34	3	22	0	50
0	61	2	58	0	43	6	15	3	6	2	8
11	74	9	77	17	50	1	13	3	22	3	27
0	62	2	15	0	23	7	16	6	31	10	15
0	28	1	33	11	29	0	28	9	28	4	19
2	12	8	19	1	29	4	16	0	6	3	27
2	12	2	33	4	34	0	11	0	22	1	29
18	21	13	49	6	32	3	4	0	3	3	5
9	41	6	47	2	44			2	18	4	5
2	25	15	48	1	29
12	49	13	49	17	28
1	58	1	39	15	52
2	37	6	30	3	56
5	34	2	10	0	19
2	28	2	29	1	31
3	33	6	56	0	49
0	7	7	43	3	52
4	46	6	37	3	44
1	43	0	32	2	27
4	36	7	40	6	28
5	52	10	36	1	21

## Sheet: mab-5_smFISH L1 (Figure S3)
mab-5 probe
20°C
anterior	posterior
5	167
0	45
47	113
1	40
0	187
0	117
3	67
1	0
0	78
2	41
0	82
9	208
21	166
1	104
8	81
0
